# Supplementary material for: Large scale study of multiple-molecule queries
Source: PubMed Central journal article supplement (PMC3225883; doi:10.1186/1758-2946-1-7), 2009-06-04
Supplement: 1758-2946-1-7-S3.pdf [file 1758-2946-1-7-S3.pdf]

The tables below list the complete results data set by data set of all the methods discussed in the manuscript. The highest performance per data set is shown in **bold**.

| Dataset      | Method     | AUC           | AUAC          | F1            | BEDROC        |
|--------------|------------|---------------|---------------|---------------|---------------|
| muv-gpcr-2   | MAX-SIM    | 0.7216        | 0.7205        | 0.0667        | 0.3170        |
|              | MIN-SIM    | 0.4794        | 0.4784        | 0.0000        | 0.0394        |
|              | SUM-SIM    | 0.4902        | 0.4892        | 0.0000        | 0.0347        |
|              | NUMDEN-SIM | 0.5191        | 0.5181        | 0.0000        | 0.0640        |
|              | MIN-RANK   | 0.7118        | 0.7107        | <b>0.1333</b> | <b>0.3307</b> |
|              | SUM-RANK   | 0.4556        | 0.4546        | 0.0000        | 0.0485        |
|              | MAX-RANK   | 0.4289        | 0.4279        | 0.0000        | 0.0166        |
|              | BAYES      | 0.5903        | 0.5893        | 0.0000        | 0.0909        |
|              | BKD        | 0.7417        | 0.7407        | 0.0333        | 0.2120        |
|              | ETD        | 0.7554        | 0.7544        | 0.0000        | 0.2439        |
|              | TPD        | <b>0.7768</b> | <b>0.7758</b> | 0.1000        | 0.3093        |
|              | SUM-EH     | 0.6921        | 0.6910        | 0.0667        | 0.1790        |
|              | SUM-ET     | 0.7220        | 0.7210        | 0.0667        | 0.3182        |
|              | SUM-TP     | 0.7216        | 0.7206        | 0.0667        | 0.3189        |
| wom-estrogen | MAX-SIM    | 0.9936        | 0.9934        | 0.5000        | 0.9156        |
|              | MIN-SIM    | 0.6578        | 0.6576        | 0.0000        | 0.1175        |
|              | SUM-SIM    | 0.9622        | 0.9620        | 0.1250        | 0.8717        |
|              | NUMDEN-SIM | 0.9604        | 0.9602        | 0.1562        | 0.8706        |
|              | MIN-RANK   | 0.9979        | 0.9977        | 0.4844        | 0.9622        |
|              | SUM-RANK   | 0.9398        | 0.9396        | 0.0625        | 0.6977        |
|              | MAX-RANK   | 0.6027        | 0.6025        | 0.0000        | 0.0985        |
|              | BAYES      | 0.9655        | 0.9653        | 0.0781        | 0.6736        |
|              | BKD        | 0.9943        | 0.9941        | 0.4375        | 0.9310        |
|              | ETD        | <b>0.9986</b> | <b>0.9984</b> | 0.5000        | <b>0.9698</b> |
|              | TPD        | 0.9971        | 0.9969        | 0.3594        | 0.9466        |
|              | SUM-EH     | 0.9614        | 0.9612        | 0.0938        | 0.6881        |
|              | SUM-ET     | 0.9952        | 0.9950        | 0.5000        | 0.9380        |
|              | SUM-TP     | 0.9958        | 0.9956        | <b>0.5156</b> | 0.9458        |
| suth-steroid | MAX-SIM    | 0.9998        | 0.9997        | 0.4286        | 0.9936        |
|              | MIN-SIM    | 0.9869        | 0.9868        | 0.1429        | 0.8616        |
|              | SUM-SIM    | 0.9995        | 0.9994        | 0.4286        | 0.9878        |
|              | NUMDEN-SIM | 0.9994        | 0.9993        | 0.4643        | 0.9875        |
|              | MIN-RANK   | 0.9997        | 0.9997        | 0.3929        | 0.9932        |
|              | SUM-RANK   | 0.9969        | 0.9968        | 0.1786        | 0.9418        |
|              | MAX-RANK   | 0.9309        | 0.9308        | 0.0357        | 0.6701        |
|              | BAYES      | 0.9996        | 0.9995        | <b>0.6429</b> | 0.9901        |
|              | BKD        | 0.9995        | 0.9994        | 0.4286        | 0.9882        |
|              | ETD        | 0.9998        | 0.9997        | 0.3929        | 0.9936        |
|              | TPD        | 0.9995        | 0.9994        | 0.3214        | 0.9893        |
|              | SUM-EH     | 0.9997        | 0.9996        | 0.5000        | 0.9922        |
|              | SUM-ET     | 0.9998        | 0.9997        | 0.4286        | 0.9937        |
|              | SUM-TP     | <b>0.9998</b> | <b>0.9997</b> | 0.4286        | <b>0.9938</b> |

| Dataset             | Method     | AUC           | AUAC          | F1            | BEDROC        |
|---------------------|------------|---------------|---------------|---------------|---------------|
| suth-dhfr           | MAX-SIM    | 0.9998        | 0.9978        | <b>0.9584</b> | 0.9576        |
|                     | MIN-SIM    | 0.7295        | 0.7274        | 0.0596        | 0.2646        |
|                     | SUM-SIM    | 0.9844        | 0.9823        | 0.8864        | 0.9156        |
|                     | NUMDEN-SIM | 0.9829        | 0.9809        | 0.8837        | 0.9130        |
|                     | MIN-RANK   | 0.9998        | 0.9978        | 0.9432        | 0.9570        |
|                     | SUM-RANK   | 0.9798        | 0.9777        | 0.8061        | 0.9042        |
|                     | MAX-RANK   | 0.7253        | 0.7232        | 0.0208        | 0.1884        |
|                     | BAYES      | 0.9830        | 0.9809        | 0.6385        | 0.8454        |
|                     | BKD        | 0.9992        | 0.9971        | 0.9238        | 0.9504        |
|                     | ETD        | <b>1.0000</b> | <b>0.9979</b> | 0.9557        | <b>0.9588</b> |
|                     | TPD        | 0.9999        | 0.9979        | 0.9446        | 0.9586        |
|                     | SUM-EH     | 0.9898        | 0.9878        | 0.7327        | 0.8878        |
|                     | SUM-ET     | 0.9999        | 0.9978        | 0.9571        | 0.9582        |
|                     | SUM-TP     | 0.9999        | 0.9978        | 0.9557        | 0.9583        |
| suth-benzodiazepine | MAX-SIM    | 0.9991        | 0.9980        | 0.8465        | 0.9649        |
|                     | MIN-SIM    | 0.5891        | 0.5879        | 0.0074        | 0.1221        |
|                     | SUM-SIM    | 0.8972        | 0.8961        | 0.4703        | 0.6758        |
|                     | NUMDEN-SIM | 0.8607        | 0.8596        | 0.3020        | 0.5515        |
|                     | MIN-RANK   | <b>0.9991</b> | <b>0.9980</b> | 0.7574        | 0.9619        |
|                     | SUM-RANK   | 0.6505        | 0.6493        | 0.0025        | 0.0862        |
|                     | MAX-RANK   | 0.4925        | 0.4914        | 0.0000        | 0.0478        |
|                     | BAYES      | 0.9401        | 0.9389        | 0.1510        | 0.5553        |
|                     | BKD        | 0.9934        | 0.9922        | 0.7351        | 0.9109        |
|                     | ETD        | 0.9970        | 0.9959        | <b>0.8589</b> | <b>0.9664</b> |
|                     | TPD        | 0.9975        | 0.9964        | 0.7871        | 0.9601        |
|                     | SUM-EH     | 0.9633        | 0.9622        | 0.4777        | 0.7501        |
|                     | SUM-ET     | 0.9991        | 0.9979        | 0.8490        | 0.9648        |
|                     | SUM-TP     | 0.9991        | 0.9979        | 0.8490        | 0.9649        |
| wom-egfr            | MAX-SIM    | 0.9454        | 0.9451        | 0.3784        | 0.7596        |
|                     | MIN-SIM    | 0.5265        | 0.5263        | 0.0135        | 0.1049        |
|                     | SUM-SIM    | 0.8803        | 0.8801        | 0.1892        | 0.5811        |
|                     | NUMDEN-SIM | 0.8741        | 0.8738        | 0.1486        | 0.5542        |
|                     | MIN-RANK   | 0.9636        | 0.9634        | 0.3649        | 0.8246        |
|                     | SUM-RANK   | 0.7301        | 0.7299        | 0.0405        | 0.2120        |
|                     | MAX-RANK   | 0.4456        | 0.4454        | 0.0000        | 0.1141        |
|                     | BAYES      | 0.8724        | 0.8722        | 0.0135        | 0.4611        |
|                     | BKD        | 0.9671        | 0.9669        | <b>0.3919</b> | 0.7924        |
|                     | ETD        | <b>0.9725</b> | <b>0.9723</b> | <b>0.3919</b> | <b>0.8273</b> |
|                     | TPD        | 0.9719        | 0.9717        | 0.2703        | 0.7949        |
|                     | SUM-EH     | 0.8899        | 0.8897        | 0.1351        | 0.5567        |
|                     | SUM-ET     | 0.9472        | 0.9470        | <b>0.3919</b> | 0.7683        |
|                     | SUM-TP     | 0.9474        | 0.9472        | 0.3649        | 0.7729        |

| Dataset              | Method     | AUC           | AUAC          | F1            | BEDROC        |
|----------------------|------------|---------------|---------------|---------------|---------------|
| muv-kinase-3         | MAX-SIM    | 0.7520        | 0.7510        | 0.1667        | 0.2649        |
|                      | MIN-SIM    | 0.6691        | 0.6681        | 0.0000        | 0.0801        |
|                      | SUM-SIM    | 0.6376        | 0.6366        | 0.0000        | 0.1077        |
|                      | NUMDEN-SIM | 0.6572        | 0.6562        | 0.0000        | 0.1370        |
|                      | MIN-RANK   | 0.8117        | 0.8107        | <b>0.2000</b> | 0.3516        |
|                      | SUM-RANK   | 0.6393        | 0.6383        | 0.0000        | 0.1112        |
|                      | MAX-RANK   | 0.5605        | 0.5595        | 0.0000        | 0.1242        |
|                      | BAYES      | 0.6178        | 0.6167        | 0.0000        | 0.1328        |
|                      | BKD        | <b>0.8889</b> | <b>0.8879</b> | 0.0000        | 0.3255        |
|                      | ETD        | 0.8864        | 0.8854        | 0.0000        | 0.3532        |
|                      | TPD        | 0.8340        | 0.8329        | 0.1667        | <b>0.3891</b> |
|                      | SUM-EH     | 0.6526        | 0.6516        | 0.0667        | 0.2098        |
|                      | SUM-ET     | 0.7574        | 0.7564        | 0.1667        | 0.2680        |
|                      | SUM-TP     | 0.7597        | 0.7587        | 0.1667        | 0.2675        |
| wom-cdk2             | MAX-SIM    | 0.9618        | 0.9614        | 0.6974        | 0.8767        |
|                      | MIN-SIM    | 0.6918        | 0.6914        | 0.0000        | 0.0972        |
|                      | SUM-SIM    | 0.8241        | 0.8237        | 0.2105        | 0.3982        |
|                      | NUMDEN-SIM | 0.8034        | 0.8030        | 0.1447        | 0.3690        |
|                      | MIN-RANK   | 0.9770        | 0.9765        | 0.5329        | 0.8926        |
|                      | SUM-RANK   | 0.7102        | 0.7097        | 0.0132        | 0.1824        |
|                      | MAX-RANK   | 0.5999        | 0.5995        | 0.0000        | 0.1013        |
|                      | BAYES      | 0.8204        | 0.8200        | 0.0132        | 0.2282        |
|                      | BKD        | 0.9825        | 0.9821        | <b>0.7632</b> | 0.9002        |
|                      | ETD        | <b>0.9852</b> | <b>0.9847</b> | 0.7237        | <b>0.9181</b> |
|                      | TPD        | 0.9839        | 0.9834        | 0.6711        | 0.9114        |
|                      | SUM-EH     | 0.8923        | 0.8918        | 0.1579        | 0.4697        |
|                      | SUM-ET     | 0.9618        | 0.9614        | 0.7039        | 0.8781        |
|                      | SUM-TP     | 0.9623        | 0.9619        | 0.7039        | 0.8784        |
| stahl-p38-map-kinase | MAX-SIM    | 0.9916        | 0.9916        | 0.4167        | 0.9473        |
|                      | MIN-SIM    | 0.9917        | 0.9916        | 0.0833        | 0.8809        |
|                      | SUM-SIM    | 0.9959        | 0.9958        | 0.3750        | 0.9548        |
|                      | NUMDEN-SIM | <b>0.9969</b> | <b>0.9969</b> | <b>0.5417</b> | 0.9615        |
|                      | MIN-RANK   | 0.9964        | 0.9963        | 0.3333        | 0.9602        |
|                      | SUM-RANK   | 0.9962        | 0.9961        | 0.2917        | 0.9374        |
|                      | MAX-RANK   | 0.9506        | 0.9505        | 0.0000        | 0.5783        |
|                      | BAYES      | 0.9834        | 0.9833        | 0.1667        | 0.8542        |
|                      | BKD        | 0.9916        | 0.9915        | 0.4583        | 0.9411        |
|                      | ETD        | 0.9924        | 0.9923        | 0.4583        | 0.9479        |
|                      | TPD        | 0.9900        | 0.9900        | 0.4167        | 0.9384        |
|                      | SUM-EH     | 0.9831        | 0.9830        | 0.2083        | 0.8518        |
|                      | SUM-ET     | 0.9969        | 0.9968        | 0.4583        | <b>0.9619</b> |
|                      | SUM-TP     | 0.9963        | 0.9963        | 0.4583        | 0.9606        |

| Dataset   | Method     | AUC           | AUAC          | F1            | BEDROC        |
|-----------|------------|---------------|---------------|---------------|---------------|
| wom-pde5  | MAX-SIM    | 0.9895        | 0.9893        | 0.6364        | 0.9276        |
|           | MIN-SIM    | 0.8043        | 0.8040        | 0.0114        | 0.2799        |
|           | SUM-SIM    | 0.9747        | 0.9745        | 0.1818        | 0.7414        |
|           | NUMDEN-SIM | 0.9695        | 0.9692        | 0.1250        | 0.6870        |
|           | MIN-RANK   | <b>0.9939</b> | <b>0.9936</b> | 0.5568        | 0.9417        |
|           | SUM-RANK   | 0.9058        | 0.9055        | 0.0000        | 0.3674        |
|           | MAX-RANK   | 0.7183        | 0.7180        | 0.0000        | 0.1857        |
|           | BAYES      | 0.9379        | 0.9376        | 0.0114        | 0.5397        |
|           | BKD        | 0.9874        | 0.9871        | <b>0.7500</b> | 0.9248        |
|           | ETD        | 0.9875        | 0.9873        | 0.7386        | <b>0.9458</b> |
|           | TPD        | 0.9888        | 0.9886        | 0.6818        | 0.9390        |
|           | SUM-EH     | 0.9669        | 0.9667        | 0.2500        | 0.7528        |
|           | SUM-ET     | 0.9929        | 0.9926        | 0.7159        | 0.9353        |
|           | SUM-TP     | 0.9927        | 0.9925        | 0.7273        | 0.9352        |
| wom-d2    | MAX-SIM    | 0.9901        | 0.9892        | 0.6677        | 0.9075        |
|           | MIN-SIM    | 0.8404        | 0.8394        | 0.0629        | 0.3921        |
|           | SUM-SIM    | 0.9546        | 0.9537        | 0.2754        | 0.7420        |
|           | NUMDEN-SIM | 0.9506        | 0.9496        | 0.2665        | 0.7184        |
|           | MIN-RANK   | 0.9959        | 0.9950        | 0.5808        | 0.9344        |
|           | SUM-RANK   | 0.9314        | 0.9304        | 0.1078        | 0.5796        |
|           | MAX-RANK   | 0.7772        | 0.7763        | 0.0479        | 0.2630        |
|           | BAYES      | 0.9077        | 0.9067        | 0.0150        | 0.3799        |
|           | BKD        | 0.9963        | 0.9954        | 0.7036        | 0.9293        |
|           | ETD        | 0.9951        | 0.9941        | <b>0.7246</b> | <b>0.9431</b> |
|           | TPD        | <b>0.9964</b> | <b>0.9955</b> | 0.7126        | 0.9387        |
|           | SUM-EH     | 0.9151        | 0.9141        | 0.0629        | 0.4551        |
|           | SUM-ET     | 0.9908        | 0.9898        | 0.6766        | 0.9115        |
|           | SUM-TP     | 0.9907        | 0.9897        | 0.6707        | 0.9116        |
| muv-ppi-3 | MAX-SIM    | 0.6714        | 0.6704        | 0.0667        | 0.1439        |
|           | MIN-SIM    | 0.5118        | 0.5107        | 0.0000        | 0.0616        |
|           | SUM-SIM    | 0.6662        | 0.6652        | 0.0000        | 0.0830        |
|           | NUMDEN-SIM | 0.7053        | 0.7043        | 0.0000        | 0.1308        |
|           | MIN-RANK   | 0.6592        | 0.6582        | 0.0667        | 0.1818        |
|           | SUM-RANK   | 0.6858        | 0.6847        | 0.0000        | 0.1325        |
|           | MAX-RANK   | 0.6426        | 0.6416        | 0.0000        | 0.1344        |
|           | BAYES      | 0.5750        | 0.5739        | 0.0000        | 0.0244        |
|           | BKD        | <b>0.7334</b> | <b>0.7324</b> | <b>0.1000</b> | <b>0.2195</b> |
|           | ETD        | 0.7257        | 0.7246        | 0.0667        | 0.1950        |
|           | TPD        | 0.7234        | 0.7224        | <b>0.1000</b> | 0.2074        |
|           | SUM-EH     | 0.5696        | 0.5686        | 0.0000        | 0.0687        |
|           | SUM-ET     | 0.7200        | 0.7190        | 0.0667        | 0.1546        |
|           | SUM-TP     | 0.7185        | 0.7175        | 0.0333        | 0.1631        |

| Dataset        | Method     | AUC           | AUAC          | F1            | BEDROC        |
|----------------|------------|---------------|---------------|---------------|---------------|
| muv-ppi-1      | MAX-SIM    | 0.6292        | 0.6282        | <b>0.1333</b> | 0.2098        |
|                | MIN-SIM    | 0.4804        | 0.4794        | 0.0000        | 0.0697        |
|                | SUM-SIM    | 0.4250        | 0.4239        | 0.0000        | 0.0293        |
|                | NUMDEN-SIM | 0.4563        | 0.4553        | 0.0000        | 0.0390        |
|                | MIN-RANK   | 0.6308        | 0.6297        | 0.1000        | <b>0.2237</b> |
|                | SUM-RANK   | 0.4331        | 0.4320        | 0.0000        | 0.0456        |
|                | MAX-RANK   | 0.4094        | 0.4084        | 0.0000        | 0.0287        |
|                | BAYES      | 0.5298        | 0.5288        | 0.0000        | 0.0749        |
|                | BKD        | <b>0.6828</b> | <b>0.6817</b> | 0.0667        | 0.1810        |
|                | ETD        | 0.6812        | 0.6802        | 0.0667        | 0.1904        |
|                | TPD        | 0.6756        | 0.6746        | <b>0.1333</b> | 0.2091        |
|                | SUM-EH     | 0.5819        | 0.5808        | 0.1000        | 0.1965        |
|                | SUM-ET     | 0.6271        | 0.6261        | <b>0.1333</b> | 0.2108        |
|                | SUM-TP     | 0.6292        | 0.6281        | <b>0.1333</b> | 0.2106        |
| muv-protease-1 | MAX-SIM    | 0.9369        | 0.9358        | <b>0.4000</b> | 0.6860        |
|                | MIN-SIM    | 0.6445        | 0.6435        | 0.0000        | 0.1093        |
|                | SUM-SIM    | 0.8073        | 0.8063        | 0.1667        | 0.4223        |
|                | NUMDEN-SIM | 0.8041        | 0.8030        | 0.2000        | 0.4004        |
|                | MIN-RANK   | 0.9692        | 0.9681        | 0.2333        | 0.7275        |
|                | SUM-RANK   | 0.6577        | 0.6567        | 0.0000        | 0.0502        |
|                | MAX-RANK   | 0.5769        | 0.5758        | 0.0000        | 0.0491        |
|                | BAYES      | 0.8530        | 0.8519        | 0.0333        | 0.4286        |
|                | BKD        | <b>0.9761</b> | <b>0.9751</b> | <b>0.4000</b> | <b>0.7455</b> |
|                | ETD        | 0.9697        | 0.9687        | <b>0.4000</b> | 0.7164        |
|                | TPD        | 0.9685        | 0.9674        | 0.3000        | 0.7217        |
|                | SUM-EH     | 0.9089        | 0.9079        | 0.2667        | 0.6478        |
|                | SUM-ET     | 0.9381        | 0.9371        | <b>0.4000</b> | 0.6850        |
|                | SUM-TP     | 0.9379        | 0.9369        | <b>0.4000</b> | 0.6853        |
| wom-hiv1rt     | MAX-SIM    | 0.9427        | 0.9424        | 0.6667        | 0.8520        |
|                | MIN-SIM    | 0.5554        | 0.5551        | 0.0000        | 0.0846        |
|                | SUM-SIM    | 0.8413        | 0.8410        | 0.1515        | 0.4340        |
|                | NUMDEN-SIM | 0.8328        | 0.8325        | 0.0909        | 0.3952        |
|                | MIN-RANK   | 0.9439        | 0.9436        | 0.5455        | 0.8537        |
|                | SUM-RANK   | 0.7609        | 0.7606        | 0.0000        | 0.1149        |
|                | MAX-RANK   | 0.5843        | 0.5840        | 0.0000        | 0.0569        |
|                | BAYES      | 0.8409        | 0.8406        | 0.0000        | 0.3240        |
|                | BKD        | 0.9509        | 0.9506        | 0.5758        | 0.7821        |
|                | ETD        | 0.9590        | 0.9587        | <b>0.7374</b> | <b>0.8672</b> |
|                | TPD        | <b>0.9628</b> | <b>0.9625</b> | 0.6869        | 0.8614        |
|                | SUM-EH     | 0.8876        | 0.8873        | 0.1717        | 0.5091        |
|                | SUM-ET     | 0.9454        | 0.9452        | 0.7071        | 0.8453        |
|                | SUM-TP     | 0.9446        | 0.9443        | 0.6869        | 0.8389        |

| Dataset        | Method     | AUC           | AUAC          | F1            | BEDROC        |
|----------------|------------|---------------|---------------|---------------|---------------|
| stahl-thrombin | MAX-SIM    | 0.9831        | 0.9829        | 0.6418        | 0.9466        |
|                | MIN-SIM    | 0.7935        | 0.7933        | 0.0000        | 0.2013        |
|                | SUM-SIM    | 0.9466        | 0.9464        | 0.5970        | 0.8271        |
|                | NUMDEN-SIM | 0.9477        | 0.9475        | 0.5970        | 0.8332        |
|                | MIN-RANK   | 0.9853        | 0.9851        | 0.5075        | 0.9563        |
|                | SUM-RANK   | 0.9310        | 0.9308        | 0.1343        | 0.7257        |
|                | MAX-RANK   | 0.6968        | 0.6966        | 0.0000        | 0.1145        |
|                | BAYES      | 0.8996        | 0.8994        | 0.3881        | 0.6124        |
|                | BKD        | 0.9908        | 0.9906        | <b>0.7164</b> | 0.9201        |
|                | ETD        | <b>0.9965</b> | <b>0.9963</b> | 0.6866        | <b>0.9585</b> |
|                | TPD        | 0.9958        | 0.9956        | 0.6716        | 0.9484        |
|                | SUM-EH     | 0.8823        | 0.8821        | 0.5672        | 0.6441        |
|                | SUM-ET     | 0.9823        | 0.9821        | 0.6418        | 0.9484        |
|                | SUM-TP     | 0.9830        | 0.9828        | 0.6418        | 0.9478        |
| muv-gpcr-1     | MAX-SIM    | 0.6248        | 0.6237        | 0.0000        | 0.2719        |
|                | MIN-SIM    | 0.5258        | 0.5248        | 0.0000        | 0.0359        |
|                | SUM-SIM    | 0.5368        | 0.5357        | 0.0000        | 0.0396        |
|                | NUMDEN-SIM | 0.5693        | 0.5683        | 0.0000        | 0.0504        |
|                | MIN-RANK   | 0.6239        | 0.6229        | <b>0.0667</b> | 0.2641        |
|                | SUM-RANK   | 0.5041        | 0.5031        | 0.0000        | 0.0222        |
|                | MAX-RANK   | 0.5022        | 0.5011        | 0.0000        | 0.0111        |
|                | BAYES      | 0.5369        | 0.5359        | 0.0000        | 0.0969        |
|                | BKD        | 0.6844        | 0.6834        | 0.0000        | 0.2709        |
|                | ETD        | <b>0.6920</b> | <b>0.6910</b> | 0.0000        | <b>0.2995</b> |
|                | TPD        | 0.6792        | 0.6782        | 0.0000        | 0.2735        |
|                | SUM-EH     | 0.5840        | 0.5830        | 0.0000        | 0.0645        |
|                | SUM-ET     | 0.6347        | 0.6337        | 0.0000        | 0.2754        |
|                | SUM-TP     | 0.6337        | 0.6327        | 0.0000        | 0.2728        |
| wom-als2       | MAX-SIM    | 0.9837        | 0.9836        | 0.4524        | 0.9138        |
|                | MIN-SIM    | 0.5353        | 0.5352        | 0.0000        | 0.0633        |
|                | SUM-SIM    | 0.9334        | 0.9333        | 0.2381        | 0.7361        |
|                | NUMDEN-SIM | 0.9098        | 0.9097        | 0.1905        | 0.6669        |
|                | MIN-RANK   | <b>0.9935</b> | <b>0.9934</b> | <b>0.5952</b> | <b>0.9464</b> |
|                | SUM-RANK   | 0.7652        | 0.7651        | 0.0000        | 0.1866        |
|                | MAX-RANK   | 0.3966        | 0.3964        | 0.0000        | 0.0423        |
|                | BAYES      | 0.9778        | 0.9777        | 0.0000        | 0.7290        |
|                | BKD        | 0.9842        | 0.9841        | 0.5714        | 0.8981        |
|                | ETD        | 0.9837        | 0.9836        | <b>0.5952</b> | 0.9254        |
|                | TPD        | 0.9839        | 0.9837        | 0.5000        | 0.9119        |
|                | SUM-EH     | 0.9837        | 0.9835        | 0.2381        | 0.8329        |
|                | SUM-ET     | 0.9859        | 0.9858        | 0.5238        | 0.9156        |
|                | SUM-TP     | 0.9854        | 0.9853        | 0.5714        | 0.9177        |

| Dataset        | Method     | AUC           | AUAC          | F1            | BEDROC        |
|----------------|------------|---------------|---------------|---------------|---------------|
| muv-protease-2 | MAX-SIM    | 0.9026        | 0.9015        | <b>0.4000</b> | 0.6207        |
|                | MIN-SIM    | 0.6828        | 0.6817        | 0.0333        | 0.1313        |
|                | SUM-SIM    | 0.9012        | 0.9001        | 0.0333        | 0.4126        |
|                | NUMDEN-SIM | 0.9145        | 0.9135        | 0.0333        | 0.4494        |
|                | MIN-RANK   | 0.9258        | 0.9247        | <b>0.4000</b> | <b>0.6942</b> |
|                | SUM-RANK   | 0.8430        | 0.8419        | 0.0000        | 0.2309        |
|                | MAX-RANK   | 0.5867        | 0.5856        | 0.0000        | 0.0428        |
|                | BAYES      | 0.9235        | 0.9225        | 0.0333        | 0.5669        |
|                | BKD        | 0.9165        | 0.9155        | 0.2667        | 0.6151        |
|                | ETD        | 0.9243        | 0.9233        | 0.2667        | 0.6651        |
|                | TPD        | 0.9197        | 0.9187        | 0.2667        | 0.6174        |
|                | SUM-EH     | <b>0.9408</b> | <b>0.9397</b> | 0.2000        | 0.6004        |
|                | SUM-ET     | 0.9366        | 0.9355        | <b>0.4000</b> | 0.6528        |
|                | SUM-TP     | 0.9358        | 0.9347        | 0.3667        | 0.6534        |
| muv-ppi-2      | MAX-SIM    | 0.6939        | 0.6929        | 0.0000        | 0.2801        |
|                | MIN-SIM    | 0.4659        | 0.4649        | 0.0000        | 0.0612        |
|                | SUM-SIM    | 0.5523        | 0.5512        | 0.0000        | 0.0421        |
|                | NUMDEN-SIM | 0.5973        | 0.5963        | 0.0000        | 0.0701        |
|                | MIN-RANK   | 0.6963        | 0.6954        | <b>0.0333</b> | <b>0.2874</b> |
|                | SUM-RANK   | 0.5598        | 0.5588        | 0.0000        | 0.0408        |
|                | MAX-RANK   | 0.5624        | 0.5613        | 0.0000        | 0.0620        |
|                | BAYES      | 0.6125        | 0.6114        | 0.0000        | 0.0646        |
|                | BKD        | 0.7387        | 0.7377        | 0.0000        | 0.2424        |
|                | ETD        | <b>0.7627</b> | <b>0.7617</b> | 0.0000        | 0.2815        |
|                | TPD        | 0.7521        | 0.7511        | 0.0000        | 0.2230        |
|                | SUM-EH     | 0.6004        | 0.5994        | 0.0000        | 0.0954        |
|                | SUM-ET     | 0.6933        | 0.6923        | 0.0000        | 0.2812        |
|                | SUM-TP     | 0.6940        | 0.6930        | 0.0000        | 0.2814        |
| wom-impdh      | MAX-SIM    | 0.9544        | 0.9543        | 0.6327        | 0.8485        |
|                | MIN-SIM    | 0.7022        | 0.7021        | 0.0000        | 0.1480        |
|                | SUM-SIM    | 0.9275        | 0.9273        | <b>0.7347</b> | 0.8057        |
|                | NUMDEN-SIM | 0.9276        | 0.9275        | <b>0.7347</b> | 0.7997        |
|                | MIN-RANK   | 0.9679        | 0.9677        | 0.5510        | 0.8827        |
|                | SUM-RANK   | 0.9136        | 0.9135        | 0.0816        | 0.6674        |
|                | MAX-RANK   | 0.5467        | 0.5466        | 0.0000        | 0.1216        |
|                | BAYES      | 0.9438        | 0.9437        | 0.2449        | 0.7956        |
|                | BKD        | 0.9638        | 0.9637        | <b>0.7347</b> | <b>0.8887</b> |
|                | ETD        | 0.9710        | 0.9708        | 0.6735        | 0.8815        |
|                | TPD        | <b>0.9737</b> | <b>0.9736</b> | 0.5102        | 0.8777        |
|                | SUM-EH     | 0.9463        | 0.9461        | 0.5918        | 0.8598        |
|                | SUM-ET     | 0.9540        | 0.9539        | 0.6327        | 0.8494        |
|                | SUM-TP     | 0.9542        | 0.9541        | 0.6327        | 0.8491        |

| Dataset       | Method     | AUC           | AUAC          | F1            | BEDROC        |
|---------------|------------|---------------|---------------|---------------|---------------|
| wom-fxa       | MAX-SIM    | 0.9985        | 0.9982        | 0.6449        | 0.9679        |
|               | MIN-SIM    | 0.8209        | 0.8205        | 0.1869        | 0.4273        |
|               | SUM-SIM    | 0.9669        | 0.9666        | 0.6542        | 0.7972        |
|               | NUMDEN-SIM | 0.9635        | 0.9632        | 0.6542        | 0.7843        |
|               | MIN-RANK   | <b>0.9994</b> | <b>0.9991</b> | 0.8131        | <b>0.9855</b> |
|               | SUM-RANK   | 0.9226        | 0.9223        | 0.3458        | 0.6183        |
|               | MAX-RANK   | 0.7677        | 0.7674        | 0.0280        | 0.2660        |
|               | BAYES      | 0.8879        | 0.8876        | 0.1121        | 0.4601        |
|               | BKD        | 0.9945        | 0.9942        | <b>0.9159</b> | 0.9747        |
|               | ETD        | 0.9939        | 0.9936        | 0.8505        | 0.9806        |
|               | TPD        | 0.9961        | 0.9958        | 0.8411        | 0.9779        |
|               | SUM-EH     | 0.9514        | 0.9511        | 0.4579        | 0.7709        |
|               | SUM-ET     | 0.9992        | 0.9989        | 0.6636        | 0.9791        |
|               | SUM-TP     | 0.9993        | 0.9990        | 0.6916        | 0.9808        |
| muv-chaperone | MAX-SIM    | 0.6406        | 0.6396        | 0.0667        | 0.2001        |
|               | MIN-SIM    | 0.5255        | 0.5244        | 0.0000        | 0.0461        |
|               | SUM-SIM    | 0.5732        | 0.5722        | 0.0000        | 0.0671        |
|               | NUMDEN-SIM | 0.6074        | 0.6063        | 0.0000        | 0.0925        |
|               | MIN-RANK   | 0.6830        | 0.6819        | 0.1000        | 0.3008        |
|               | SUM-RANK   | 0.5619        | 0.5608        | 0.0000        | 0.0550        |
|               | MAX-RANK   | 0.4234        | 0.4224        | 0.0000        | 0.0117        |
|               | BAYES      | 0.5962        | 0.5951        | 0.0000        | 0.1401        |
|               | BKD        | <b>0.8129</b> | <b>0.8119</b> | 0.1667        | <b>0.4210</b> |
|               | ETD        | 0.8096        | 0.8085        | <b>0.2000</b> | 0.4077        |
|               | TPD        | 0.7607        | 0.7597        | 0.1333        | 0.3999        |
|               | SUM-EH     | 0.6518        | 0.6507        | 0.0000        | 0.1816        |
|               | SUM-ET     | 0.6405        | 0.6395        | 0.0667        | 0.2015        |
|               | SUM-TP     | 0.6410        | 0.6399        | 0.0667        | 0.2016        |
| muv-nr-1      | MAX-SIM    | 0.7294        | 0.7283        | <b>0.2000</b> | 0.2984        |
|               | MIN-SIM    | 0.5245        | 0.5235        | 0.0000        | 0.0343        |
|               | SUM-SIM    | 0.5949        | 0.5938        | 0.0000        | 0.0407        |
|               | NUMDEN-SIM | 0.6198        | 0.6188        | 0.0000        | 0.0638        |
|               | MIN-RANK   | 0.6876        | 0.6866        | 0.1333        | <b>0.3257</b> |
|               | SUM-RANK   | 0.5636        | 0.5626        | 0.0000        | 0.0872        |
|               | MAX-RANK   | 0.5203        | 0.5192        | 0.0667        | 0.0835        |
|               | BAYES      | 0.5781        | 0.5770        | 0.0000        | 0.0854        |
|               | BKD        | 0.7329        | 0.7319        | 0.1000        | 0.2489        |
|               | ETD        | 0.7293        | 0.7282        | 0.0667        | 0.2325        |
|               | TPD        | 0.7102        | 0.7092        | 0.1000        | 0.2662        |
|               | SUM-EH     | 0.6216        | 0.6205        | 0.0000        | 0.0573        |
|               | SUM-ET     | <b>0.7488</b> | <b>0.7478</b> | <b>0.2000</b> | 0.3019        |
|               | SUM-TP     | 0.7474        | 0.7463        | <b>0.2000</b> | 0.3041        |



| Dataset            | Method     | AUC           | AUAC          | F1            | BEDROC        |
|--------------------|------------|---------------|---------------|---------------|---------------|
| nci-hiv            | MAX-SIM    | 0.9320        | 0.9308        | 0.7855        | 0.8610        |
|                    | MIN-SIM    | 0.4715        | 0.4703        | 0.0000        | 0.0295        |
|                    | SUM-SIM    | 0.7156        | 0.7144        | 0.2627        | 0.4018        |
|                    | NUMDEN-SIM | 0.6738        | 0.6726        | 0.1735        | 0.3051        |
|                    | MIN-RANK   | 0.9583        | 0.9571        | 0.6482        | 0.8726        |
|                    | SUM-RANK   | 0.4128        | 0.4116        | 0.0000        | 0.0103        |
|                    | MAX-RANK   | 0.3182        | 0.3170        | 0.0000        | 0.0096        |
|                    | BAYES      | 0.6125        | 0.6113        | 0.0024        | 0.0546        |
|                    | BKD        | 0.9758        | 0.9746        | 0.7566        | 0.8708        |
|                    | ETD        | <b>0.9804</b> | <b>0.9792</b> | <b>0.8120</b> | <b>0.8894</b> |
|                    | TPD        | 0.9789        | 0.9777        | 0.7518        | 0.8865        |
|                    | SUM-EH     | 0.8547        | 0.8535        | 0.2169        | 0.5143        |
|                    | SUM-ET     | 0.9316        | 0.9304        | 0.7880        | 0.8612        |
|                    | SUM-TP     | 0.9319        | 0.9307        | 0.7880        | 0.8612        |
| wom-ppar-gamma     | MAX-SIM    | 0.9717        | 0.9717        | 0.5926        | 0.9208        |
|                    | MIN-SIM    | 0.9311        | 0.9311        | 0.1111        | 0.6961        |
|                    | SUM-SIM    | 0.9787        | 0.9786        | 0.2963        | 0.9120        |
|                    | NUMDEN-SIM | 0.9817        | 0.9816        | 0.3333        | 0.9157        |
|                    | MIN-RANK   | 0.9856        | 0.9855        | 0.6296        | 0.9266        |
|                    | SUM-RANK   | 0.9759        | 0.9758        | 0.2593        | 0.8377        |
|                    | MAX-RANK   | 0.9084        | 0.9083        | 0.1111        | 0.6372        |
|                    | BAYES      | 0.9389        | 0.9388        | 0.0000        | 0.6593        |
|                    | BKD        | 0.9984        | 0.9983        | <b>0.7037</b> | <b>0.9734</b> |
|                    | ETD        | <b>0.9984</b> | <b>0.9984</b> | 0.6667        | 0.9734        |
|                    | TPD        | 0.9959        | 0.9958        | 0.6296        | 0.9506        |
|                    | SUM-EH     | 0.9736        | 0.9735        | 0.4815        | 0.8656        |
|                    | SUM-ET     | 0.9829        | 0.9828        | 0.6296        | 0.9239        |
|                    | SUM-TP     | 0.9831        | 0.9831        | 0.6296        | 0.9234        |
| wom-p38-map-kinase | MAX-SIM    | 0.9761        | 0.9759        | 0.5593        | 0.8761        |
|                    | MIN-SIM    | 0.6653        | 0.6651        | 0.0000        | 0.1046        |
|                    | SUM-SIM    | 0.9467        | 0.9465        | 0.2034        | 0.6538        |
|                    | NUMDEN-SIM | 0.9400        | 0.9399        | 0.1695        | 0.6152        |
|                    | MIN-RANK   | 0.9925        | 0.9923        | 0.5254        | 0.9294        |
|                    | SUM-RANK   | 0.8469        | 0.8468        | 0.0000        | 0.2195        |
|                    | MAX-RANK   | 0.5093        | 0.5091        | 0.0000        | 0.1104        |
|                    | BAYES      | 0.9335        | 0.9333        | 0.0000        | 0.5511        |
|                    | BKD        | 0.9855        | 0.9853        | 0.5593        | 0.9024        |
|                    | ETD        | <b>0.9965</b> | <b>0.9963</b> | <b>0.5932</b> | <b>0.9528</b> |
|                    | TPD        | 0.9934        | 0.9933        | 0.5254        | 0.9273        |
|                    | SUM-EH     | 0.9481        | 0.9479        | 0.2542        | 0.7151        |
|                    | SUM-ET     | 0.9892        | 0.9891        | 0.5593        | 0.9050        |
|                    | SUM-TP     | 0.9887        | 0.9885        | 0.5254        | 0.9004        |

| Dataset        | Method     | AUC           | AUAC          | F1            | BEDROC        |
|----------------|------------|---------------|---------------|---------------|---------------|
| wom-androgen   | MAX-SIM    | 0.9053        | 0.9052        | 0.2778        | 0.7304        |
|                | MIN-SIM    | 0.4414        | 0.4413        | 0.0000        | 0.0394        |
|                | SUM-SIM    | 0.6662        | 0.6661        | 0.0833        | 0.3334        |
|                | NUMDEN-SIM | 0.6597        | 0.6595        | 0.0278        | 0.3264        |
|                | MIN-RANK   | 0.9183        | 0.9182        | 0.2778        | 0.7467        |
|                | SUM-RANK   | 0.4992        | 0.4991        | 0.0000        | 0.0195        |
|                | MAX-RANK   | 0.4080        | 0.4079        | 0.0000        | 0.0097        |
|                | BAYES      | 0.8522        | 0.8521        | 0.0000        | 0.4082        |
|                | BKD        | 0.9099        | 0.9098        | <b>0.3056</b> | 0.5968        |
|                | ETD        | <b>0.9591</b> | <b>0.9590</b> | <b>0.3056</b> | <b>0.7647</b> |
|                | TPD        | 0.9538        | 0.9537        | 0.2500        | 0.6923        |
|                | SUM-EH     | 0.8437        | 0.8436        | 0.0278        | 0.4784        |
|                | SUM-ET     | 0.9035        | 0.9034        | 0.2778        | 0.7306        |
|                | SUM-TP     | 0.9045        | 0.9044        | 0.2778        | 0.7311        |
| muv-nr-2       | MAX-SIM    | 0.4977        | 0.4967        | <b>0.0000</b> | 0.0425        |
|                | MIN-SIM    | 0.4756        | 0.4745        | <b>0.0000</b> | 0.0367        |
|                | SUM-SIM    | 0.4595        | 0.4584        | <b>0.0000</b> | 0.0126        |
|                | NUMDEN-SIM | 0.5147        | 0.5136        | <b>0.0000</b> | 0.0313        |
|                | MIN-RANK   | 0.4891        | 0.4880        | <b>0.0000</b> | 0.0770        |
|                | SUM-RANK   | 0.5142        | 0.5132        | <b>0.0000</b> | 0.0381        |
|                | MAX-RANK   | 0.4931        | 0.4920        | <b>0.0000</b> | 0.0651        |
|                | BAYES      | 0.5639        | 0.5629        | <b>0.0000</b> | 0.0468        |
|                | BKD        | 0.5962        | 0.5952        | <b>0.0000</b> | 0.0697        |
|                | ETD        | 0.5918        | 0.5908        | <b>0.0000</b> | 0.0718        |
|                | TPD        | <b>0.5981</b> | <b>0.5970</b> | <b>0.0000</b> | <b>0.0912</b> |
|                | SUM-EH     | 0.5437        | 0.5427        | <b>0.0000</b> | 0.0111        |
|                | SUM-ET     | 0.5238        | 0.5228        | <b>0.0000</b> | 0.0362        |
|                | SUM-TP     | 0.5145        | 0.5135        | <b>0.0000</b> | 0.0317        |
| muv-protease-3 | MAX-SIM    | 0.8583        | 0.8572        | 0.3333        | 0.5259        |
|                | MIN-SIM    | 0.6609        | 0.6598        | 0.0000        | 0.1020        |
|                | SUM-SIM    | 0.8043        | 0.8033        | 0.3333        | 0.4387        |
|                | NUMDEN-SIM | 0.8264        | 0.8254        | 0.3000        | 0.4616        |
|                | MIN-RANK   | 0.8907        | 0.8897        | 0.1667        | 0.5313        |
|                | SUM-RANK   | 0.7971        | 0.7960        | 0.0333        | 0.3317        |
|                | MAX-RANK   | 0.6398        | 0.6388        | 0.0000        | 0.0582        |
|                | BAYES      | 0.8035        | 0.8025        | 0.1000        | 0.4033        |
|                | BKD        | 0.8919        | 0.8909        | <b>0.3667</b> | <b>0.6154</b> |
|                | ETD        | <b>0.9033</b> | <b>0.9023</b> | <b>0.3667</b> | 0.5935        |
|                | TPD        | 0.9033        | 0.9023        | 0.3333        | 0.5969        |
|                | SUM-EH     | 0.8138        | 0.8128        | 0.3333        | 0.4430        |
|                | SUM-ET     | 0.8727        | 0.8716        | <b>0.3667</b> | 0.5289        |
|                | SUM-TP     | 0.8710        | 0.8700        | <b>0.3667</b> | 0.5250        |

| Dataset             | Method     | AUC           | AUAC          | F1            | BEDROC        |
|---------------------|------------|---------------|---------------|---------------|---------------|
| muv-kinase-1        | MAX-SIM    | 0.7535        | 0.7524        | 0.1333        | 0.3785        |
|                     | MIN-SIM    | 0.5104        | 0.5093        | 0.0333        | 0.0948        |
|                     | SUM-SIM    | 0.8112        | 0.8102        | 0.1333        | 0.4558        |
|                     | NUMDEN-SIM | 0.8336        | 0.8326        | 0.1000        | 0.4969        |
|                     | MIN-RANK   | 0.7535        | 0.7525        | 0.1000        | 0.3363        |
|                     | SUM-RANK   | 0.7899        | 0.7888        | 0.0000        | 0.2521        |
|                     | MAX-RANK   | 0.4922        | 0.4911        | 0.0000        | 0.1367        |
|                     | BAYES      | 0.7650        | 0.7640        | 0.0667        | 0.3377        |
|                     | BKD        | <b>0.8566</b> | <b>0.8555</b> | 0.1333        | 0.5099        |
|                     | ETD        | 0.8535        | 0.8525        | 0.1667        | <b>0.5146</b> |
|                     | TPD        | 0.8379        | 0.8368        | <b>0.2000</b> | 0.4741        |
|                     | SUM-EH     | 0.8019        | 0.8008        | 0.1333        | 0.4160        |
|                     | SUM-ET     | 0.8353        | 0.8342        | 0.1333        | 0.5105        |
| SUM-TP              | 0.8076     | 0.8065        | 0.1333        | 0.4889        |               |
| stahl-neuraminidase | MAX-SIM    | 0.9999        | 0.9999        | <b>0.8235</b> | 0.9977        |
|                     | MIN-SIM    | 0.9992        | 0.9991        | 0.2353        | 0.9827        |
|                     | SUM-SIM    | 0.9993        | 0.9992        | 0.4118        | 0.9852        |
|                     | NUMDEN-SIM | 0.9997        | 0.9996        | 0.5882        | 0.9925        |
|                     | MIN-RANK   | <b>1.0000</b> | <b>0.9999</b> | 0.5882        | <b>0.9985</b> |
|                     | SUM-RANK   | 0.9950        | 0.9949        | 0.1176        | 0.9213        |
|                     | MAX-RANK   | 0.9947        | 0.9947        | 0.0588        | 0.9138        |
|                     | BAYES      | 0.9966        | 0.9966        | 0.1765        | 0.9446        |
|                     | BKD        | 0.9999        | 0.9999        | 0.6471        | 0.9980        |
|                     | ETD        | 1.0000        | 0.9999        | 0.7647        | 0.9982        |
|                     | TPD        | 0.9994        | 0.9994        | 0.3529        | 0.9882        |
|                     | SUM-EH     | 0.9991        | 0.9991        | 0.3529        | 0.9817        |
|                     | SUM-ET     | 0.9999        | 0.9999        | 0.7647        | 0.9977        |
| SUM-TP              | 0.9999     | 0.9999        | 0.7647        | 0.9977        |               |
| suth-estrogen       | MAX-SIM    | 0.9995        | 0.9985        | 0.9501        | 0.9766        |
|                     | MIN-SIM    | 0.8476        | 0.8465        | 0.0443        | 0.2327        |
|                     | SUM-SIM    | 0.9952        | 0.9942        | 0.8255        | 0.9609        |
|                     | NUMDEN-SIM | 0.9949        | 0.9939        | 0.8172        | 0.9567        |
|                     | MIN-RANK   | 0.9997        | 0.9987        | 0.8837        | 0.9754        |
|                     | SUM-RANK   | 0.9910        | 0.9900        | 0.6676        | 0.9296        |
|                     | MAX-RANK   | 0.5314        | 0.5304        | 0.0277        | 0.0629        |
|                     | BAYES      | 0.9961        | 0.9950        | 0.6454        | 0.9427        |
|                     | BKD        | 0.9991        | 0.9980        | 0.8947        | 0.9724        |
|                     | ETD        | <b>0.9999</b> | <b>0.9989</b> | 0.9474        | <b>0.9787</b> |
|                     | TPD        | 0.9999        | 0.9989        | 0.9169        | 0.9783        |
|                     | SUM-EH     | 0.9963        | 0.9952        | 0.7562        | 0.9509        |
|                     | SUM-ET     | 0.9995        | 0.9985        | <b>0.9557</b> | 0.9765        |
| SUM-TP              | 0.9995     | 0.9985        | <b>0.9557</b> | 0.9765        |               |

| Dataset          | Method     | AUC           | AUAC          | F1            | BEDROC        |
|------------------|------------|---------------|---------------|---------------|---------------|
| stahl-cox2       | MAX-SIM    | 0.9814        | 0.9810        | 0.7120        | 0.9324        |
|                  | MIN-SIM    | 0.5328        | 0.5325        | 0.0000        | 0.0516        |
|                  | SUM-SIM    | 0.8971        | 0.8967        | 0.5200        | 0.6929        |
|                  | NUMDEN-SIM | 0.8918        | 0.8915        | 0.5280        | 0.6875        |
|                  | MIN-RANK   | 0.9853        | 0.9850        | 0.6080        | 0.9406        |
|                  | SUM-RANK   | 0.8569        | 0.8565        | 0.0720        | 0.5521        |
|                  | MAX-RANK   | 0.5073        | 0.5069        | 0.0000        | 0.0291        |
|                  | BAYES      | 0.9169        | 0.9165        | 0.0720        | 0.5644        |
|                  | BKD        | 0.9793        | 0.9789        | 0.6640        | 0.8937        |
|                  | ETD        | 0.9893        | 0.9890        | <b>0.7360</b> | <b>0.9465</b> |
|                  | TPD        | <b>0.9899</b> | <b>0.9895</b> | 0.7120        | 0.9424        |
|                  | SUM-EH     | 0.9228        | 0.9224        | 0.3520        | 0.6292        |
|                  | SUM-ET     | 0.9810        | 0.9806        | 0.7120        | 0.9324        |
|                  | SUM-TP     | 0.9814        | 0.9810        | 0.7120        | 0.9325        |
| muv-rtk          | MAX-SIM    | 0.6975        | 0.6965        | 0.0667        | 0.2809        |
|                  | MIN-SIM    | 0.4617        | 0.4607        | 0.0333        | 0.0701        |
|                  | SUM-SIM    | 0.5356        | 0.5346        | 0.0000        | 0.0900        |
|                  | NUMDEN-SIM | 0.5738        | 0.5727        | 0.0000        | 0.1175        |
|                  | MIN-RANK   | 0.7318        | 0.7307        | 0.0667        | 0.2504        |
|                  | SUM-RANK   | 0.5154        | 0.5143        | 0.0333        | 0.0448        |
|                  | MAX-RANK   | 0.4604        | 0.4594        | 0.0000        | 0.0512        |
|                  | BAYES      | 0.5468        | 0.5458        | 0.0000        | 0.0929        |
|                  | BKD        | 0.8100        | 0.8089        | <b>0.1000</b> | <b>0.3401</b> |
|                  | ETD        | <b>0.8109</b> | <b>0.8099</b> | 0.0667        | 0.3121        |
|                  | TPD        | 0.7927        | 0.7917        | <b>0.1000</b> | 0.3119        |
|                  | SUM-EH     | 0.6223        | 0.6213        | 0.0667        | 0.1536        |
|                  | SUM-ET     | 0.6994        | 0.6984        | 0.0667        | 0.2819        |
|                  | SUM-TP     | 0.6988        | 0.6978        | 0.0667        | 0.2829        |
| stahl-gelatinase | MAX-SIM    | 0.9315        | 0.9314        | 0.1000        | 0.7185        |
|                  | MIN-SIM    | 0.7238        | 0.7237        | 0.0000        | 0.2371        |
|                  | SUM-SIM    | 0.8912        | 0.8911        | 0.0250        | 0.5803        |
|                  | NUMDEN-SIM | 0.8922        | 0.8920        | 0.0250        | 0.5653        |
|                  | MIN-RANK   | 0.9533        | 0.9532        | 0.2500        | 0.8332        |
|                  | SUM-RANK   | 0.7943        | 0.7942        | 0.0000        | 0.3090        |
|                  | MAX-RANK   | 0.5223        | 0.5222        | 0.0000        | 0.1325        |
|                  | BAYES      | 0.8291        | 0.8290        | 0.0000        | 0.2314        |
|                  | BKD        | 0.9748        | 0.9747        | <b>0.3000</b> | <b>0.8843</b> |
|                  | ETD        | <b>0.9769</b> | <b>0.9768</b> | 0.2500        | 0.8777        |
|                  | TPD        | 0.9726        | 0.9725        | 0.1250        | 0.7920        |
|                  | SUM-EH     | 0.8390        | 0.8389        | 0.1000        | 0.3765        |
|                  | SUM-ET     | 0.9295        | 0.9294        | 0.1000        | 0.7191        |
|                  | SUM-TP     | 0.9310        | 0.9309        | 0.1000        | 0.7191        |

| Dataset    | Method     | AUC           | AUAC          | F1            | BEDROC        |
|------------|------------|---------------|---------------|---------------|---------------|
| muv-gpcr-3 | MAX-SIM    | 0.5457        | 0.5446        | 0.0000        | 0.1325        |
|            | MIN-SIM    | 0.5345        | 0.5335        | <b>0.0333</b> | 0.0570        |
|            | SUM-SIM    | 0.5584        | 0.5574        | 0.0000        | 0.0949        |
|            | NUMDEN-SIM | 0.6070        | 0.6059        | 0.0000        | 0.1364        |
|            | MIN-RANK   | 0.5766        | 0.5756        | <b>0.0333</b> | 0.1332        |
|            | SUM-RANK   | 0.6029        | 0.6019        | <b>0.0333</b> | 0.0870        |
|            | MAX-RANK   | 0.4695        | 0.4685        | <b>0.0333</b> | 0.0375        |
|            | BAYES      | 0.5486        | 0.5476        | 0.0000        | 0.0524        |
|            | BKD        | <b>0.6359</b> | <b>0.6349</b> | 0.0000        | 0.1962        |
|            | ETD        | 0.6262        | 0.6252        | 0.0000        | <b>0.2089</b> |
|            | TPD        | 0.6188        | 0.6178        | 0.0000        | 0.1365        |
|            | SUM-EH     | 0.5614        | 0.5603        | 0.0000        | 0.0916        |
|            | SUM-ET     | 0.6117        | 0.6107        | 0.0000        | 0.1478        |
|            | SUM-TP     | 0.5998        | 0.5988        | 0.0000        | 0.1505        |
| wom-cox2   | MAX-SIM    | 0.9402        | 0.9400        | 0.4474        | 0.8394        |
|            | MIN-SIM    | 0.5317        | 0.5315        | 0.0000        | 0.0557        |
|            | SUM-SIM    | 0.8035        | 0.8033        | 0.3026        | 0.4713        |
|            | NUMDEN-SIM | 0.7985        | 0.7982        | 0.2368        | 0.4632        |
|            | MIN-RANK   | 0.9536        | 0.9533        | 0.5263        | 0.8700        |
|            | SUM-RANK   | 0.7198        | 0.7196        | 0.0000        | 0.1527        |
|            | MAX-RANK   | 0.5480        | 0.5478        | 0.0000        | 0.0489        |
|            | BAYES      | 0.8558        | 0.8555        | 0.0000        | 0.4018        |
|            | BKD        | 0.9362        | 0.9360        | 0.4868        | 0.7685        |
|            | ETD        | 0.9698        | 0.9695        | <b>0.5789</b> | <b>0.8840</b> |
|            | TPD        | <b>0.9716</b> | <b>0.9713</b> | 0.5000        | 0.8660        |
|            | SUM-EH     | 0.8740        | 0.8738        | 0.0789        | 0.5040        |
|            | SUM-ET     | 0.9398        | 0.9396        | 0.4474        | 0.8399        |
|            | SUM-TP     | 0.9400        | 0.9397        | 0.4474        | 0.8407        |
| muv-rnase  | MAX-SIM    | 0.6955        | 0.6945        | 0.0667        | 0.2443        |
|            | MIN-SIM    | 0.2680        | 0.2670        | 0.0000        | 0.0229        |
|            | SUM-SIM    | 0.4483        | 0.4473        | 0.0000        | 0.0102        |
|            | NUMDEN-SIM | 0.4655        | 0.4645        | 0.0000        | 0.0195        |
|            | MIN-RANK   | 0.7611        | 0.7601        | <b>0.1000</b> | 0.3487        |
|            | SUM-RANK   | 0.4291        | 0.4281        | 0.0000        | 0.0191        |
|            | MAX-RANK   | 0.3306        | 0.3297        | 0.0000        | 0.0177        |
|            | BAYES      | 0.5105        | 0.5094        | 0.0000        | 0.0874        |
|            | BKD        | 0.7814        | 0.7804        | 0.0667        | <b>0.3516</b> |
|            | ETD        | 0.7817        | 0.7807        | 0.0667        | 0.3239        |
|            | TPD        | <b>0.7836</b> | <b>0.7826</b> | <b>0.1000</b> | 0.3371        |
|            | SUM-EH     | 0.6074        | 0.6064        | 0.0000        | 0.1652        |
|            | SUM-ET     | 0.7117        | 0.7107        | 0.0333        | 0.2563        |
|            | SUM-TP     | 0.6946        | 0.6936        | 0.0667        | 0.2460        |

| Dataset        | Method     | AUC           | AUAC          | F1            | BEDROC        |
|----------------|------------|---------------|---------------|---------------|---------------|
| muv-kinase-2   | MAX-SIM    | 0.8183        | 0.8173        | 0.2000        | 0.4529        |
|                | MIN-SIM    | 0.6484        | 0.6474        | 0.0000        | 0.1439        |
|                | SUM-SIM    | 0.7046        | 0.7036        | 0.0000        | 0.2460        |
|                | NUMDEN-SIM | 0.7011        | 0.7000        | 0.0000        | 0.2709        |
|                | MIN-RANK   | 0.8367        | 0.8356        | 0.2000        | 0.4811        |
|                | SUM-RANK   | 0.6434        | 0.6424        | 0.0000        | 0.1935        |
|                | MAX-RANK   | 0.5734        | 0.5724        | 0.0000        | 0.1166        |
|                | BAYES      | 0.7945        | 0.7934        | 0.0667        | 0.3002        |
|                | BKD        | 0.8661        | 0.8650        | <b>0.2333</b> | <b>0.5146</b> |
|                | ETD        | <b>0.8736</b> | <b>0.8726</b> | <b>0.2333</b> | 0.5122        |
|                | TPD        | 0.8700        | 0.8690        | <b>0.2333</b> | 0.4914        |
|                | SUM-EH     | 0.8136        | 0.8125        | 0.1667        | 0.3692        |
|                | SUM-ET     | 0.8194        | 0.8183        | 0.2000        | 0.4552        |
|                | SUM-TP     | 0.8187        | 0.8177        | 0.2000        | 0.4559        |
| stahl-estrogen | MAX-SIM    | 0.9984        | 0.9983        | 0.5472        | 0.9720        |
|                | MIN-SIM    | 0.8483        | 0.8481        | 0.0000        | 0.3577        |
|                | SUM-SIM    | 0.9825        | 0.9823        | 0.5283        | 0.9132        |
|                | NUMDEN-SIM | 0.9814        | 0.9813        | <b>0.5849</b> | 0.9040        |
|                | MIN-RANK   | <b>0.9988</b> | <b>0.9986</b> | 0.4906        | <b>0.9777</b> |
|                | SUM-RANK   | 0.9588        | 0.9586        | 0.0755        | 0.6700        |
|                | MAX-RANK   | 0.7396        | 0.7395        | 0.0189        | 0.2238        |
|                | BAYES      | 0.9802        | 0.9800        | 0.0943        | 0.8257        |
|                | BKD        | 0.9938        | 0.9937        | <b>0.5849</b> | 0.9531        |
|                | ETD        | 0.9977        | 0.9975        | 0.5283        | 0.9621        |
|                | TPD        | 0.9957        | 0.9956        | 0.4340        | 0.9387        |
|                | SUM-EH     | 0.9871        | 0.9870        | 0.3396        | 0.8586        |
|                | SUM-ET     | 0.9984        | 0.9983        | 0.5472        | 0.9724        |
|                | SUM-TP     | 0.9985        | 0.9983        | <b>0.5849</b> | 0.9730        |
